# Supplementary material
Source: publisher figshare collection journal article supplement (https://future-science-group.figshare.com/ndownloader/files/35024917)
Supplement: Supplementary file 1 [file 35024917]

Supplementary Figure 1: Time to biologic initiation during the 2-year follow-up period among patients with 2 years of follow-up
